# Supplementary material
Source: PubMed Central journal article supplement (PMC5233723)
Supplement: NIHMS840089-supplement-Supplemental.pdf [file NIHMS840089-supplement-Supplemental.pdf]

1 **Electronic supplementary materials:**

2 **Ultrasensitive Fluorescence Immunoassay for the Detection of**  
3 **Ochratoxin A Using Catalase-Mediated Fluorescence Quenching of**  
4 **CdTe QDs**

5 Xiaolin Huang<sup>1</sup>, Shengnan Zhan<sup>1</sup>, Hengyi Xu<sup>1</sup>, Xianwei Meng<sup>2</sup>, Yonghua Xiong<sup>1\*</sup>,  
6 and Xiaoyuan Chen<sup>3\*</sup>

7 <sup>1</sup>State Key Laboratory of Food Science and Technology, Nanchang University,  
8 Nanchang 330047, P. R. China;

9 <sup>2</sup>Laboratory of Controllable Preparation and Application of Nanomaterials, Center for  
10 Micro/nanomaterials and Technology, Technical Institute of Physics and Chemistry,  
11 Chinese Academy of Sciences, Beijing 100190, P. R. China;

12 <sup>3</sup>Laboratory of Molecular Imaging and Nanomedicine (LOMIN), National Institute of  
13 Biomedical Imaging and Bioengineering (NIBIB), National Institutes of Health (NIH),  
14 Bethesda, Maryland 20892, United States

15 \*Correspondence to:

16 **Dr. Yonghua Xiong**

17 State Key Laboratory of Food Science and Technology, and Jiangxi-OAI Joint  
18 Research Institute, Nanchang University

19 Address: 235 Nanjing East Road, Nanchang 330047, P.R. China

20 Phone: +0086-791-8833-4578. Fax: +0086-791-8833-3708

21 E-mail: yhxiongchen@163.com

22 **Dr. Xiaoyuan Chen**

23 Laboratory of Molecular Imaging and Nanomedicine (LOMIN), National Institute of  
24 Biomedical Imaging and Bioengineering (NIBIB), National Institutes of Health (NIH)

25 Address: Bethesda, Maryland 20892, United States

26 Phone: 301-451-4246

27 E-mail: shawn.chen@nih.gov

28

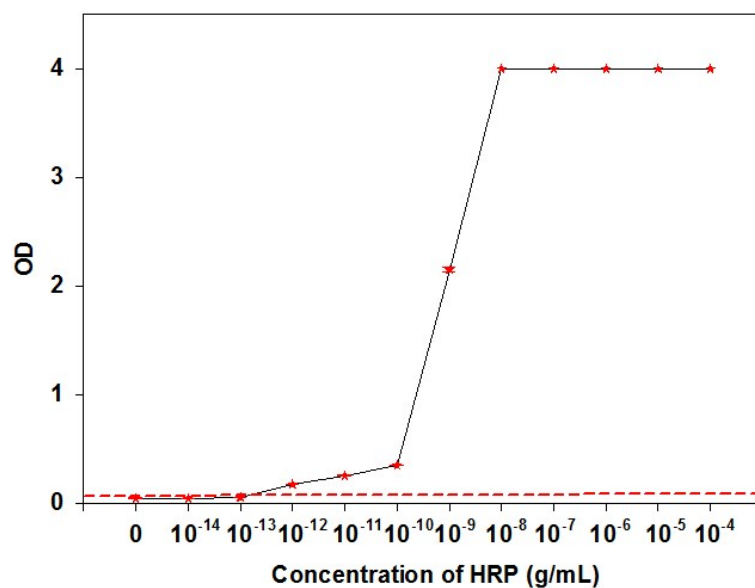

29

30 **Figure S-1.** Absorbance changes upon the interaction of tetramethylbenzidine with  
 31 different concentrations of HRP ranging from 0 to  $10^{-4}$  g/mL. The red dashed line  
 32 represents the blank absorbance plus 3 standard deviations. Thus, the LOD of the  
 33 HRP to tetramethylbenzidine was calculated as  $10^{-12}$  g/mL, which was defined as the  
 34 lowest concentration of HRP that generated a higher absorbance than the blank  
 35 absorbance plus 3 standard deviations.

36

37

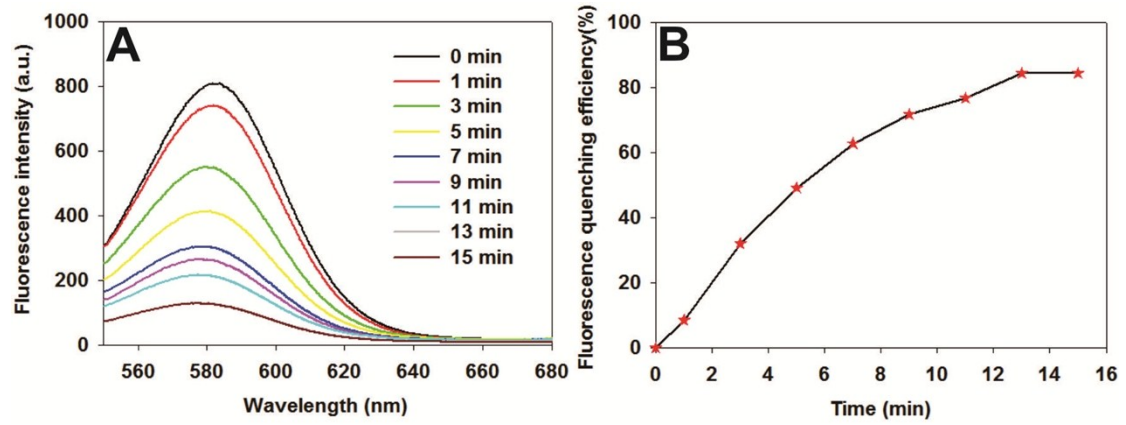

38

39 **Figure S-2.** Typical time-dependent fluorescence changes of CdTe QDs in the  
 40 presence of 10  $\mu\text{M}$   $\text{H}_2\text{O}_2$ .

41

42

### 43 **HRP-based conventional ELISA for OTA detection**

44 96-well polystyrene plates were modified with 100  $\mu\text{L}$  of protein G ( $20 \mu\text{g mL}^{-1}$ )  
45 in bicarbonate buffer (100 mM, pH 8.6) at 4  $^{\circ}\text{C}$  overnight. After washing three times  
46 with washing buffer (PBS, pH 7.4, 0.01 M, containing 0.05% Tween 20), the plates  
47 were blocked with blocking buffer ( $1 \text{ mg mL}^{-1}$  of BSA in PBS) for 2 h at 37  $^{\circ}\text{C}$ . After  
48 washing three times with washing buffer, 100  $\mu\text{L}$  of anti-OTA mAbs diluted to  
49 1:4000 in PBS were added for 2 h at room temperature. Subsequently, the plates were  
50 washed three times with PBST. And then 50  $\mu\text{L well}^{-1}$  of HRP-OTA diluted to 1:400  
51 in PBS was added and incubated with 50  $\mu\text{L well}^{-1}$  of OTA standards with a desired  
52 final concentration ( $0 \text{ ng mL}^{-1} - 5 \text{ ng mL}^{-1}$ ) by diluting a stock solution with PB (0.02  
53 M, pH 7.0) containing 5 mM NaCl and 5% methanol. After 1 h at 37  $^{\circ}\text{C}$ , the unbound  
54 content was discarded, followed by washing of the microplate three times with  
55 washing buffer and twice with PBS. Then, 100  $\mu\text{L}$  of TMB solution was added. After  
56 incubation for 15 min at room temperature, the reaction was terminated with 50  $\mu\text{L}$  of  
57 2 M  $\text{H}_2\text{SO}_4$ , and the absorbance was measured at 450 nm using a microplate reader.  
58

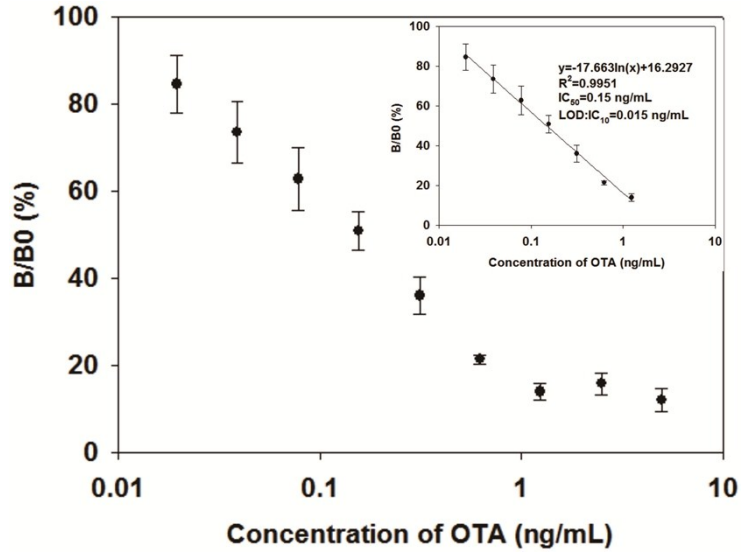

59

60 **Figure S-3.** Quantitative immunoassay of OTA using HRP-based conventional  
 61 ELISA in spiked PB solution (0.02 M, pH 7) containing 5 mM NaCl and 5%  
 62 methanol with different concentrations of OTA ranged from 0 ng mL<sup>-1</sup> to 5 ng mL<sup>-1</sup>.  
 63 Vertical bars indicate the standard deviation (n = 3).

65 **Table S1.** Checkerboard method for the selection of the working conditions of anti-  
66 OTA mAbs and CAT-OTA. The working conditions: mouse anti-OTA mAbs (1.0 mg  
67 mL<sup>-1</sup>) diluted 1:1600 to 1:6400 in coating buffer and CAT-OTA (0.72 mg mL<sup>-1</sup>)  
68 diluted 1:320 to 1:2560 in enzyme dilution buffer. A is the normalized fluorescence  
69 intensity of each well in the absence of OTA, B is the normalized fluorescence  
70 intensity of each well in the presence of 1.0 ng mL<sup>-1</sup> OTA, and C is the competitive  
71 inhibition rates are obtained by  $(1 - F/F_0) \times 100\%$ , where  $F_0$  and  $F$  represent the  
72 normalized fluorescence intensity of the negative sample (OTA-free) and an OTA-  
73 spiked PBS solution (1 ng mL<sup>-1</sup>).

|          | Dilution of CAT-OTA | Dilution of anti-OTA mAbs |               |         |
|----------|---------------------|---------------------------|---------------|---------|
|          |                     | 1600                      | 3200          | 6400    |
| <b>A</b> | <b>320</b>          | 8.5456                    | 6.66714       | 3.72282 |
|          | <b>640</b>          | 8.17628                   | 6.57454       | 3.20943 |
|          | <b>1280</b>         | 6.2419                    | <b>5.3633</b> | 2.149   |
|          | <b>2560</b>         | 4.518                     | 2.56224       | 1.30783 |

74

|          | Dilution of CAT-OTA | Dilution of anti-OTA mAbs |               |         |
|----------|---------------------|---------------------------|---------------|---------|
|          |                     | 1600                      | 3200          | 6400    |
| <b>B</b> | <b>320</b>          | 4.54284                   | 1.6993        | 0.81044 |
|          | <b>640</b>          | 3.49164                   | 1.00902       | 0.33991 |
|          | <b>1280</b>         | 1.44102                   | <b>0.2561</b> | 0.07674 |
|          | <b>2560</b>         | 0.5231                    | 0.3363        | 0.65717 |

75

|          | Dilution of CAT-OTA | Dilution of anti-OTA mAbs |              |       |
|----------|---------------------|---------------------------|--------------|-------|
|          |                     | 1600                      | 3200         | 6400  |
| <b>C</b> | <b>320</b>          | 46.84                     | 74.51        | 78.23 |
|          | <b>640</b>          | 57.30                     | 84.65        | 89.41 |
|          | <b>1280</b>         | 76.91                     | <b>95.22</b> | 96.43 |
|          | <b>2560</b>         | 88.42                     | 86.87        | 49.75 |

76  
77

78 **Table S2.** A comparison of OTA detection performance for nanomaterial-based biosensors.

| Signal readout           | Nanomaterial                   | Linear range                                              | Limit of detection        | Sample                         | Ref        |
|--------------------------|--------------------------------|-----------------------------------------------------------|---------------------------|--------------------------------|------------|
| SPR                      | Nanogold hollow balls          | 0.05 to 7.5 ng mL <sup>-1</sup>                           | 0.01 ng mL <sup>-1</sup>  | Milk                           | 1          |
| SPR                      | Gold nanorod                   | 0.04 ng mL <sup>-1</sup> to 4.03 $\mu$ g mL <sup>-1</sup> | 0.04 ng mL <sup>-1</sup>  | Corn                           | 2          |
| Colorimetric             | Gold nanoparticle              | Not available                                             | 0.5 ng mL <sup>-1</sup>   | Maize, rice and peanut         | 3          |
| Colorimetric             | Gold nanoparticles             | 0.05 to 50 ng mL <sup>-1</sup>                            | 0.009 ng mL <sup>-1</sup> | Chinese liquor                 | 4          |
| Electrochemistry         | Gold nanoparticles             | 0.1 to 1000 pg mL <sup>-1</sup>                           | 0.095 pg mL <sup>-1</sup> | Red wine                       | 5          |
| Electrochemistry         | Gold nanoparticles             | 0.001 to 1 ng mL <sup>-1</sup>                            | 0.3 pg mL <sup>-1</sup>   | Red wine                       | 6          |
| Electrochemistry         | Gold nanoparticles             | 0.0004 to 20 ng mL <sup>-1</sup>                          | 0.12 pg mL <sup>-1</sup>  | Red wine                       | 7          |
| Electrochemistry         | Magnetic beads                 | 1.3 to 153.8 ng mL <sup>-1</sup>                          | 0.32 ng mL <sup>-1</sup>  | Coffee                         | 8          |
| Electrochemiluminescence | CdTe quantum dots              | 0.001 to 20 ng mL <sup>-1</sup>                           | 0.64 pg mL <sup>-1</sup>  | Red wine                       | 9          |
| Photoelectrochemistry    | CdSe nanoparticles             | 0.01 to 50 ng mL <sup>-1</sup>                            | 2.0 pg mL <sup>-1</sup>   | Milk                           | 10         |
| Chemiluminescence        | Silica nanoparticles           | 0.001 to 50 ng mL <sup>-1</sup>                           | 0.3 pg mL <sup>-1</sup>   | Wheat                          | 11         |
| Impedance                | Gold nanoparticles             | 0.04 to 40 ng mL <sup>-1</sup>                            | 8 pg mL <sup>-1</sup>     | Beer                           | 12         |
| Impedance                | Iridium oxide nanoparticles    | 0.004 to 40 ng mL <sup>-1</sup>                           | 5.6 pg mL <sup>-1</sup>   | White wine                     | 13         |
| Fluorescence             | Upconversion nanoparticles     | 0.01 to 10 ng mL <sup>-1</sup>                            | 0.01 ng mL <sup>-1</sup>  | Maize                          | 14         |
| Fluorescence             | Silver nanocluster             | 0.01 to 0.30 ng mL <sup>-1</sup>                          | 2 pg mL <sup>-1</sup>     | Wheat                          | 15         |
| Fluorescence             | Nano-graphite                  | 8 to 160 ng mL <sup>-1</sup>                              | 8 ng mL <sup>-1</sup>     | Red wine                       | 16         |
| Fluorescence             | Europium nanoparticles         | Not available                                             | 0.05 ng mL <sup>-1</sup>  | Wheat, rice, maize and soybean | 17         |
| Fluorescence             | Fluorescent nanoparticles      | 0.04 to 60 ng mL <sup>-1</sup>                            | 2 pg mL <sup>-1</sup>     | Beer                           | 18         |
| Fluorescence             | TiO <sub>2</sub> nanoparticles | 0.6 to 403 ng mL <sup>-1</sup>                            | 0.6 ng mL <sup>-1</sup>   | Beer                           | 19         |
| Fluorescence             | Gold nanoparticles             | 2.5 pg mL <sup>-1</sup> to 1 $\mu$ g mL <sup>-1</sup>     | 1.4 pg mL <sup>-1</sup>   | Wheat and coffee bean          | 20         |
| Fluorescence             | Single-walled carbon nanohorns | 20 to 500 nM                                              | 17.2 nM                   | Red wine                       | 21         |
| Fluorescence             | CdTe quantum dots              | 0.015 to 100 ng mL <sup>-1</sup>                          | 5.4 pg mL <sup>-1</sup>   | Peanut                         | 22         |
| Fluorescence             | CdTe quantum dots              | 0.05 to 10 pg mL <sup>-1</sup>                            | 0.05 pg mL <sup>-1</sup>  | Rice, wheat, and corn          | This study |

79 **Reference:**

- 80 1 X. H. Fu, *Anal. Lett.*, 2007, **40**, 2641-2652.
- 81 2 J.-H. Park, J.-Y. Byun, H. Mun, W.-B. Shim, Y.-B. Shin, T. Li and M.-G. Kim, *Biosens. Bioelectron.*, 2014, **59**, 321-327.
- 82
- 83 3 X. Li, P. Li, Q. Zhang, R. Li, W. Zhang, Z. Zhang, X. Ding and X. Tang, *Biosens. Bioelectron.*, 2013, **49**, 426-432.
- 84
- 85 4 Y. Luan, J. Chen, C. Li, G. Xie, H. Fu, Z. Ma and A. Lu, *Toxins (Basel)*, 2015, **7**, 5377-5385.
- 86 5 J. Wu, H. Chu, Z. Mei, Y. Deng, F. Xue, L. Zheng and W. Chen, *Anal. Chim. Acta*, 2012, **753**,



87 27-31.

88 6 X. Yang, J. Qian, L. Jiang, Y. Yan, K. Wang, Q. Liu and K. Wang, *Bioelectrochemistry*, 2014,  
89 **96**, 7-13.

90 7 S. Xie, Y. Chai, Y. Yuan, L. Bai and R. Yuan, *Biosens. Bioelectron.*, 2014, **55**, 324-329.

91 8 A. Jodra, M. Hervás, M. Á. López and A. Escarpa, *Sensors Actuators B: Chem.*, 2015, **221**,  
92 777-783.

93 9 M. Yang, B. Jiang, J. Xie, Y. Xiang, R. Yuan and Y. Chai, *Talanta*, 2014, **125**, 45-50.

94 10 J. Yang, P. Gao, Y. Liu, R. Li, H. Ma, B. Du and Q. Wei, *Biosens. Bioelectron.*, 2015, **64**, 13-  
95 18.

96 11 X. Hun, F. Liu, Z. Mei, L. Ma, Z. Wang and X. Luo, *Biosens. Bioelectron.*, 2013, **39**, 145-151.

97 12 G. Evtugyn, A. Porfireva, V. Stepanova, M. Kutryeva, A. Gataulina, N. Ulakhovich, V.  
98 Evtugyn and T. Hianik, *Sensors*, 2013, **13**, 16129-16145.

99 13 L. Rivas, C. C. Mayorga-Martinez, D. Quesada-González, A. Zamora-Gálvez, A. de la  
100 Escosura-Muñiz and A. Merkoçi, *Anal. Chem.*, 2015, **87**, 5167-5172.

101 14 S. Wu, N. Duan, C. Zhu, X. Ma, M. Wang and Z. Wang, *Biosens. Bioelectron.*, 2011, **30**, 35-  
102 42.

103 15 J. Chen, X. Zhang, S. Cai, D. Wu, M. Chen, S. Wang and J. Zhang, *Biosens. Bioelectron.*,  
104 2014, **57**, 226-231.

105 16 Y. Wei, J. Zhang, X. Wang and Y. Duan, *Biosens. Bioelectron.*, 2015, **65**, 16-22.

106 17 M. Majdinasab, M. Sheikh-Zeinoddin, S. Soleimani-Zad, P. Li, Q. Zhang, X. Li, X. Tang  
107 and J. Li, *Food Control*, 2015, **47**, 126-134.

108 18 A. Hayat, R. K. Mishra, G. Catanante and J. L. Marty, *Anal. Bioanal. Chem.*, 2015, **407**, 7815-  
109 7822.

110 19 A. Sharma, A. Hayat, R. K. Mishra, G. Catanante, S. Bhand and J. L. Marty, *Toxins (Basel)*,  
111 2015, **7**, 3771-3784.

112 20 Y. Liu, J. Yu, Y. Wang, Z. Liu and Z. Lu, *Sensors Actuators B: Chem.*, 2016, **222**, 797-803.

113 21 L. Lv, C. Cui, C. Liang, W. Quan, S. Wang and Z. Guo, *Food Control*, 2016, **60**, 296-301.

114 22 C. Wang, J. Qian, K. Wang, K. Wang, Q. Liu, X. Dong, C. Wang and X. Huang, *Biosens.*  
115 *Bioelectron.*, 2015, **68**, 783-790.

116
